# Supplementary material for: Detection of Mesothelial-to-Mesenchymal Transition-Derived Carcinoma-Associated Fibroblasts in Primary Ovarian Carcinomas
Source: Preprints.org preprint supplement (doi:10.20944/preprints202405.2094.v1), 2024-05-31
Supplement: Supplementary file 1 [file supplementary]

**Table S1**. Specific primers for real-time PCR.

| **Gene** | **Forward primer** | **Reverse primer** | ***Tm* (ºC)** |
| --- | --- | --- | --- |
| E-cadherin | 5’-TGAAGGTGACAGAGCCTCTG-3’ | 5’-TGGGTGAATTCGGGCTTGTT-3’ | 62 |
| Calretinin | 5’-ACTTTGACGCAGACGGAAATG-3’ | 5’-GAAGTTCTCTTCGGTTGGCAG-3’ | 62 |
| KDR / VEGFR2 | 5’-TGAGCATGGAAGAGGATTCTG-3’ | 5’-CTCTTTCGCTTACTGTTCTGC-3’ |  |
| Collagen I | 5’-GCTATGATGAGAAATCAACCG-3’ | 5’-GCTTCCCCATCATCTCCATTC-3’ | 64 |
| TGF-β1 | 5’-TGAACCGGCCTTTCCTGCTTCTCATG-3’ | 5’-CGGAAGTCAATGTACAGCTGCCGC-3’ | 70 |
| VEGF-A | 5’-GCAGAAGGAGGAGGGCAGAAT-3’ | 5’-TATGTGCTGGCCTTGGTGAGG-3’ | 60 |
| NRP1 | 5’-AAGGTTTCTCAGCAAACTACAGTG-3’ | 5’-GGGAAGAAGCTGTGATCTGGTC-3’ |  |
| H3 Histone | 5’-AAAGCCGCTCGCAAGAGTGCG-3’ | 5’-ACTTGCCTCCTGCAAAGCAC-3’ | 62 |

* Collagen I no hay data sheet en el archivador. Los oligos los he cogido de la tabla encima del LightCycler.
